# Supplementary material
Source: PubMed Central journal article supplement (PMC5384574)
Supplement: NIHMS801050-supplement-2.pdf [file NIHMS801050-supplement-2.pdf]

## **Supplemental Experimental Procedures:**

### **Molecular cloning and generation of ASC-citrine transgenic mice:**

Conditional mASC-*citrine* transgenic mice were generated by knocking in a cassette containing mASC-*citrine* gene preceded by the CAG promoter and a transcriptional STOP site, into the Rosa26 locus, as previously described (Xiao et al., 2007). An frt-flanked IRES-hCD2 cassette was placed downstream of the mASC-*citrine* gene before the polyadenylation signal (pA). Embryonic stem (ES) cells (E14.1, C57BL/6) were transfected with the linearized targeting vector. G418-selection yielded resistant colonies of which 8 out of 200 showed the correct targeting event as verified by Southern blot analysis. Knock-in mice were on a C57BL/6 genetic background. Homozygous transgenic mice were born at Mendelian ratios, were fertile, and had no obvious aberrant phenotype. Mice 6-8 weeks of age were used in all experiments. All mice were bred and maintained in specific pathogen-free conditions; mouse protocols were approved by the Institutional Animal Care and Use Committee at the University of Massachusetts Medical School.

### **Virus stimulation *in vitro*:**

Bone marrow macrophages ( $1 \times 10^6$  cells/well in a 12-well plate) were stimulated with influenza A/PR8 (MOI=2), vesicular stomatitis virus (VSV, Indiana strain; MOI=20), mouse cytomegalovirus (mCMV; MOI=10), or herpes simplex virus

(HSV; MOI=2). Speck formation was assessed by flowsight after 4 or 12 hrs of stimulation.

### **Necrotic death stimulation *in vitro***

Bone marrow macrophages ( $1 \times 10^6$  cells/well in a 12-well plate) were stimulated with 100ng/ml of TNF $\alpha$  (R&D systems), 500nM of Birinapant (Apexbio) and/or 20 $\mu$ M of zVAD (R&D systems) for 24 hours. Control samples were primed with 100ng/ml LPS for 2 hours and then stimulated with nigericin (10 $\mu$ M) for 1 hr. Cells were harvested and stained for CD11b expression and 7AAD for flowsight analysis.

## Supplemental Figures:

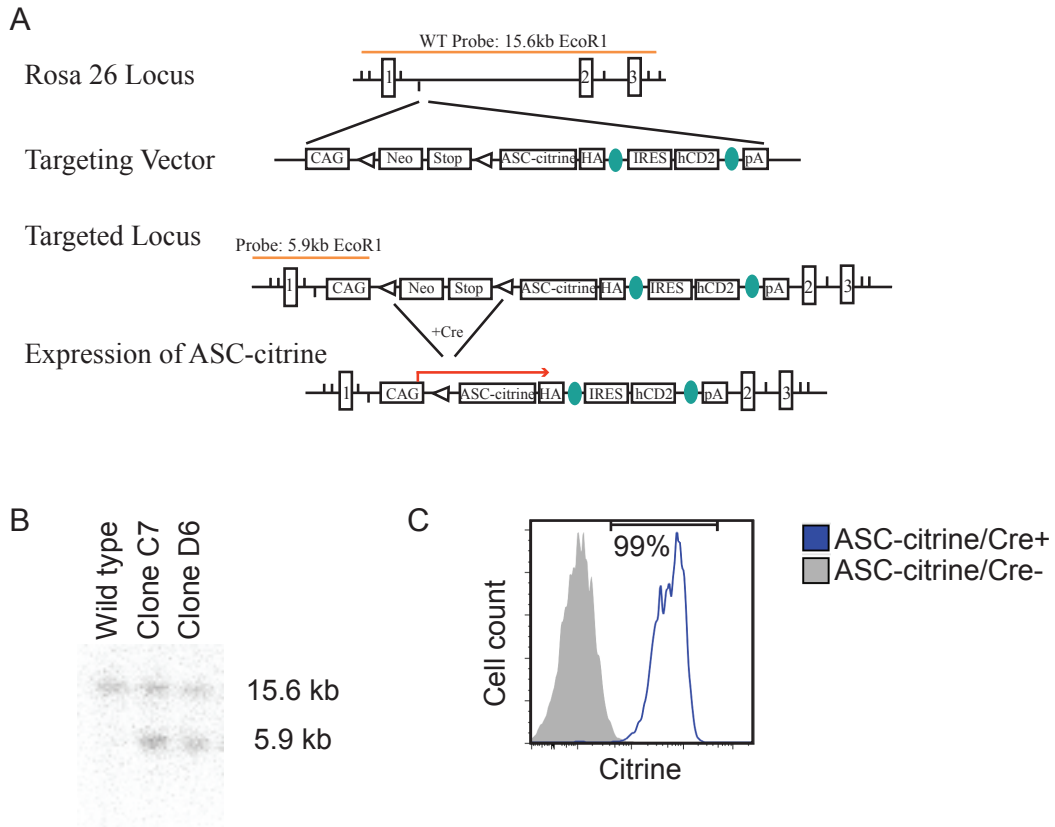

## Supplemental Figure 1. Generation of a conditional *mASC-citrine* allele in the *ROSA26* locus, related to Figure 1A.

(A) Schematic representation of the targeting strategy. (B) Southern blot analyses of targeted ES clones. Genomic DNA from wild-type (lane 1) and two representative targeted ES clones (lanes 2 and 3) was digested with EcoRI and subjected to Southern blot test. The targeted ES clones contain a 5.9kb band. (C) *mASC-citrine* expression is detected in blood cells using flow cytometry.

Caspase-1 KO/ASC-citrine (LPS+nigericin)

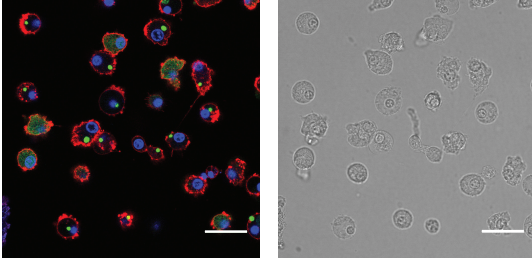

**Supplemental Figure 2. Speck formation occurs independently of caspase-1, related to Figure 1C.**

BMDMs from Caspase-1 KO/ASC-citrine mice were primed with 100 ng/mL LPS for 2 hr followed by stimulation with nigericin for 1 hr. Living cells were stained with Hoechst nuclear dye (blue) and CellMask Deep Red plasma membrane dye (red). ASC-citrine fusion proteins are shown in green. Speck formation was visualized by confocal microscopy. Scale bars represent 30  $\mu$ m.

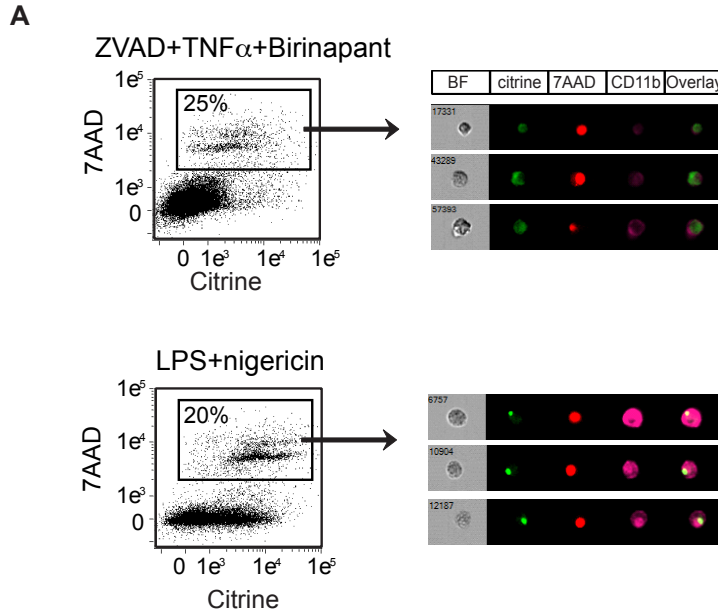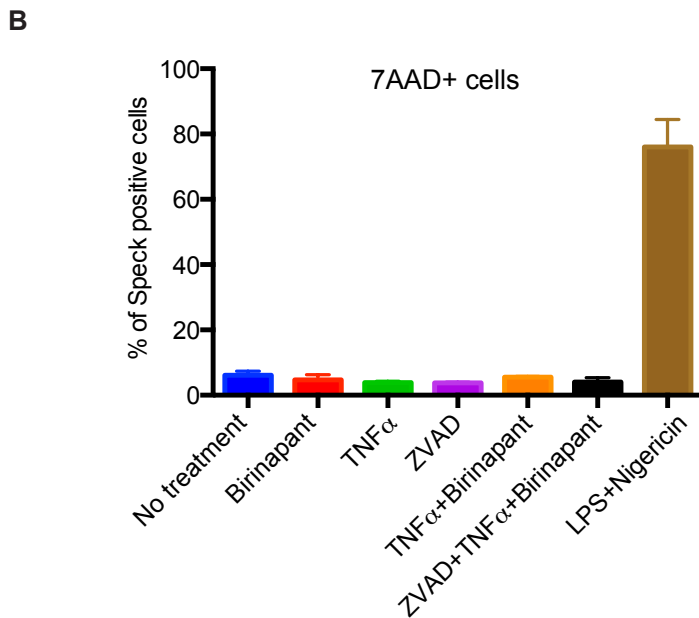

**Supplemental Figure 3. Necrotic death stimulation does not induce speck formation, related to Figure 2F.**

BMDMs from ASC-citrine mice were stimulated with 100ng/ml of TNF $\alpha$ , 500nM of Birnapant , and/or 20 $\mu$ M of zVAD for 24 hours. Control samples were primed

with 100 ng/mL LPS for 2 hr followed by stimulation with nigericin for 1 hr. Cells were stained with mAb to CD11b and 7AAD for image-based flow cytometry analysis. (A) Images from the flowsight analysis showing speck positive cells in 7AAD+ population. (B) Quantitative results showing the percentage of speck positive cells in 7AAD+ gated cells.

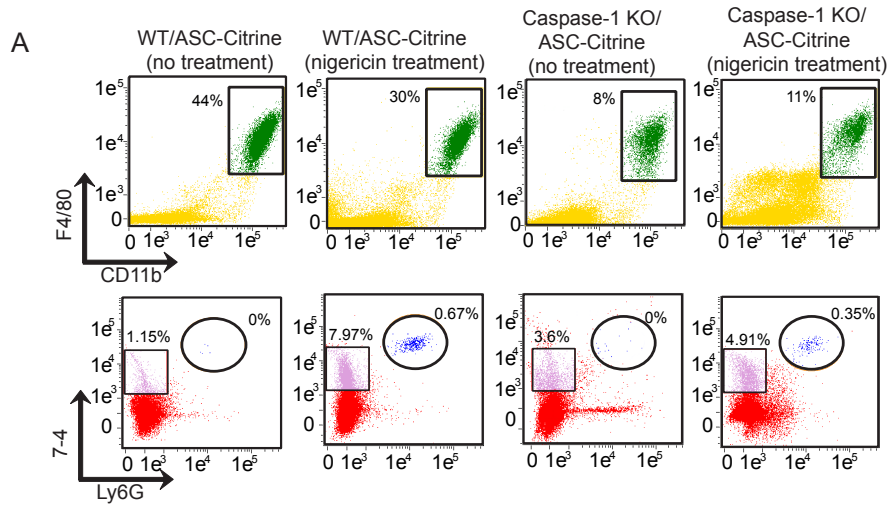

B

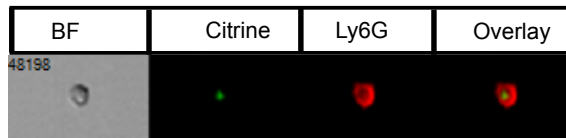

**Supplemental Figure 4. Immune cell populations in nigericin induced peritonitis model, related to Figure 3.**

(A) Gating strategies and the percentage for F4/80<sup>high</sup>/CD11b<sup>+</sup> residential macrophages (green), Ly6G<sup>+</sup> neutrophils (blue) and 7-4<sup>+</sup> recruited monocytes (pink) from each treatment conditions are shown in the dot plots. Data are representative of three independent experiments. (B) Image-based flow figures showing speck formed cells in Ly6G<sup>+</sup> neutrophils.

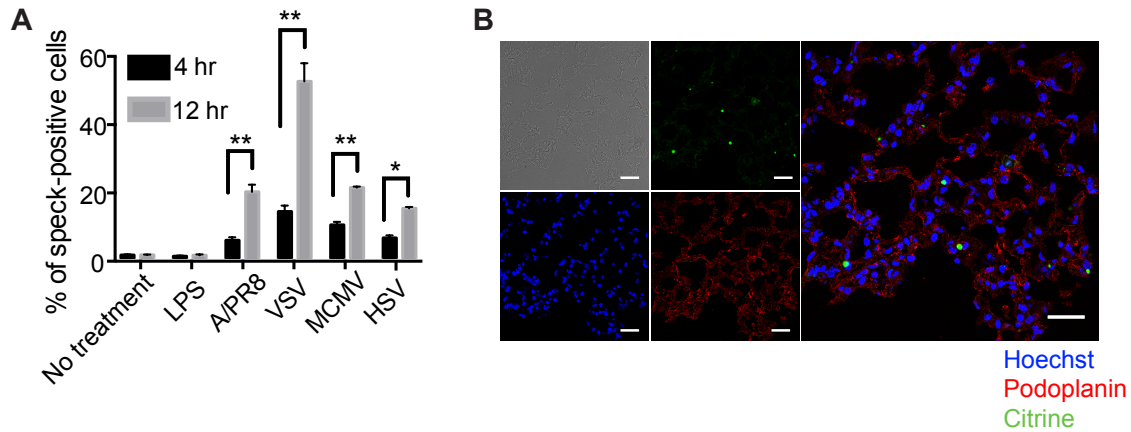

**Supplemental Figure 5. Both RNA and DNA virus induce speck formation *in vitro*, related to Figure 5.**

(A) BMDMs from ASC-citrine/Cre<sup>+</sup> mice were primed with LPS for 2 hr followed by stimulation with different viruses for 4 or 12 hr. Cells were then harvested and subjected to image-based flow cytometry analysis. CD11b<sup>+</sup> cells were gated and the percentage of speck-positive cells was analyzed as described in Figure 3. MOI for each infection are as follow: influenza A/PR8 (MOI=2), VSV (MOI=20), MCMV (MOI=10), and HSV (MOI=20). Data are presented as mean  $\pm$  SD of triplicates and are representative of two independent experiments. (B) Lung tissue from day 1 influenza A/PR8 infected ASC-citrine/Cre<sup>+</sup> mice was fixed and stained with podoplanin (gp38) (red) and Hoechst nuclear dye (blue). Green represents ASC-citrine molecules. Scale bar represents 30  $\mu$ m. Data are representative of three independent experiments. \* $p$ <0.05, \*\* $p$ <0.01 by student's *t*-test.
